# Supplementary material for: Aliovalent ion engineering of LiMg 0.5 Ti 0.5 O 2 ceramics for enhanced microwave dielectric performance
Source: Royal Society of Chemistry journal article supplement (doi:10.1039/d5tc03788c), 2025-12-30
Supplement: d5tc03788c1.pdf [file d5tc03788c1.pdf]

# Aliovalent ion engineering of $\text{LiMg}_{0.5}\text{Ti}_{0.5}\text{O}_2$ ceramics for enhanced microwave dielectric performance

Kui Liu <sup>a</sup>, Yuran Yang <sup>b</sup>, Gongwen Gan <sup>a</sup>, Gaojie Zou <sup>a</sup>, Jie Luo <sup>a</sup>, Yida Lei <sup>c</sup>, Cheng Liu <sup>c</sup>, Huaiwu Zhang <sup>c</sup>,  
Zongliang Zheng <sup>a\*</sup>

<sup>a</sup> School of Information Science and Technology, Southwest Jiaotong University, Chengdu, 610031, China

<sup>b</sup> School of Chemistry and Chemical Engineering, Chongqing University, Chongqing, 400044, China

<sup>c</sup> School of Electronic Science and Engineering, University of Electronic Science and Technology of China, Chengdu, 610054, China.

\*Corresponding Author.

E-mail address: zlzheng@swjtu.edu.cn; liukui96@163.com; liukui@swjtu.edu.cn

## 3. Results and discussion

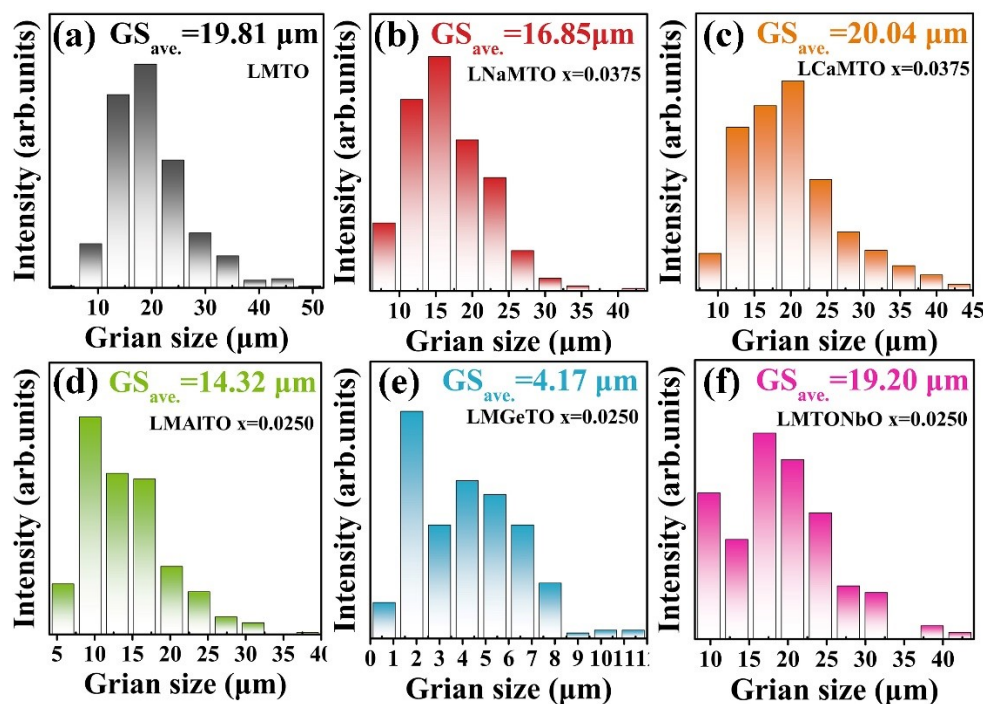

**Fig. S1.** (a)-(f) Grain size distribution statistics of LMTO, LNaMTO ( $x = 0.0375$ ), LMCaTO ( $x = 0.0375$ ), LMAITO ( $x = 0.0250$ ), LMGeTO ( $x = 0.0250$ ), and LMTNbO ( $x = 0.0250$ ) ceramics.

For complex chemical bond theory calculations, the intricate crystal structure of LMTO-based ceramics must be deconvoluted into a set of binary bond units. The resulting binary bond subsystems are represented by Formula (1):

$$LiMg_{0.5}Ti_{0.5}O_2 = LiO_{2/3} + Mg_{1/2}O_{2/3} + Ti_{1/2}O_{2/3} \quad (1)$$

Bond ionicity is calculated as follows:

$$f_i^\mu = \frac{(C^\mu)^2}{(E_g^\mu)^2} \quad (2)$$

$$C^\mu = 14.4b^\mu e^{(-k_s^\mu r_o^\mu)} \left[ \frac{(Z_A^\mu)^*}{r_o^\mu} - \frac{n(Z_B^\mu)^*}{m r_o^\mu} \right] \quad (n > m) \quad (3)$$

$$C^\mu = 14.4b^\mu e^{(-k_s^\mu r_o^\mu)} \left[ \frac{n(Z_A^\mu)^*}{m r_o^\mu} - \frac{(Z_B^\mu)^*}{r_o^\mu} \right] \quad (m > n) \quad (4)$$

$$(E_g^\mu)^2 = \left( \frac{39.74}{(d^\mu)^{2.48}} \right)^2 + (C^\mu)^2 \quad (5)$$

$$b^\mu = 0.089(N_c^\mu)^2 \quad (6)$$

$$N_c^\mu = \frac{m}{m+n} N_{CA}^\mu + \frac{n}{m+n} N_{CB}^\mu \quad (7)$$

$$k_s^\mu = \left( \frac{4k_F^\mu}{\pi\alpha_B} \right)^2 \quad (8)$$

$$k_F^\mu = [3\pi^2(N_e^\mu)^*]^{1/3} \quad (9)$$

$$r_o^\mu = \frac{d^\mu}{2} \quad (10)$$

$$(N_e^\mu)^* = \frac{(n_e^\mu)^*}{v_b^\mu} \quad (11)$$

$$(n_e^\mu)^* = \frac{(Z_A^\mu)^*}{(N_{CA}^\mu)^*} + \frac{(Z_B^\mu)^*}{(N_{CB}^\mu)^*} \quad (12)$$

$$v_b^\mu = \frac{(d^\mu)^3}{\sum_v (d^v)^3 N_b^v} \quad (13)$$

$$\varepsilon = \sum_\mu (4\pi\chi_b^\mu + 1) \quad (14)$$

$$\chi_b^\mu = \frac{(\hbar\Omega_p)^2}{4\pi(E_g)^2} \quad (15)$$

$$(\Omega_p)^2 = \frac{4\pi(N_e^\mu)e^2D_\mu A_\mu}{m} \quad (16)$$

$$A_\mu = 1 - \frac{E_g^\mu}{4E_F^\mu} + \frac{1}{3} \frac{(E_g^\mu)^2}{(4E_F^\mu)^2} \quad (17)$$

$$D_\mu = \Delta_\mu^A \Delta_\mu^B - (\delta_\mu^A \delta_\mu^B - 1)[(Z_A^\mu)^* - (Z_B^\mu)^*]^2 \quad (18)$$

$$E_F^\mu = \frac{(\hbar k_F^\mu)^2}{2m} \quad (19)$$

$$k_F^\mu = [3\pi^2(N_e^\mu)^*]^{1/3} \quad (20)$$

The variables in the theoretical framework are defined as follows:  $d^\mu$  and  $b^\mu$  correspond to chemical bond length and its empirical correction factor. The Thomas-Fermi screening is expressed through the term  $e^{(-k_{sT}^\mu)}$ , while  $(Z_A^\mu)^*$  and  $(Z_B^\mu)^*$  represent effective valence electron numbers. The average valence electron density is denoted by  $n_e^\mu$  and  $v_b^\mu$  describes the bond volume. Fundamental constants include the Bohr radius  $a = 0.5292 \text{ \AA}$ , Planck's constant  $\hbar = 4.13566 \times 10^{-15} \text{ eV}\cdot\text{s}$ , and elementary constants  $e = 4.8 \times 10^{-10} \text{ esu}$  and  $m = 9.1 \times 10^{-28} \text{ g}$ . Structural parameters include coordination numbers  $N_{CA}^\mu$  and  $N_{CB}^\mu$  for cations and anions, with  $D_\mu$  accounting for d-electron corrections and  $A_\mu$  representing the Penn dielectric correction. Electronic structure parameters comprise Fermi energy  $E_F^\mu$  and Fermi wavevector  $k_F^\mu$ , with  $\Delta_\mu^A$ ,  $\Delta_\mu^B$ ,  $\delta_\mu^A$ , and  $\delta_\mu^B$  as system-specific coefficients.

The lattice energy is calculated as follows:

$$U_{cal} = \sum_{\mu} (U_{bc}^\mu + U_{bi}^\mu) \quad (21)$$

$$U_{bc}^\mu = 2100m \frac{(Z_+^\mu)^{1.64}}{(d^\mu)^{0.75}} f_c^\mu \quad (22)$$

$$U_{bi}^\mu = 1270 \frac{(m+n)Z_+^\mu Z_-^\mu}{d^\mu} (1 - \frac{0.4}{d^\mu}) f_i^\mu \quad (23)$$

$U_{bc}^\mu$  and  $U_{bi}^\mu$  represent the lattice energy contributions from ions and covalent bonds, respectively, while  $Z_+^\mu$  and  $Z_-^\mu$  denote the valences of the cations and anions involved in the chemical bonding.

The bond energy is calculated as follows:

$$E_b^\mu = t_c E_c^\mu + t_i E_i^\mu \quad (24)$$

$$E_i^\mu = \frac{33200}{d^\mu} \quad (25)$$

$$E_c^\mu = \frac{(r_{CA} + r_{CB})}{d^\mu} (E_{A-A} E_{B-B})^{1/2} \quad (26)$$

$$t_i + t_c = 1 \quad (27)$$

$$t_i = \left| \frac{S_A - S_B}{6} \right| \quad (28)$$

where  $S$  and  $r$  are the electronegativity and covalent radius respectively, and  $E_{A-A}$  and  $E_{B-B}$  are the homonuclear bond energies.
